# Supplementary material
Source: PubMed Central journal article supplement (PMC4324097)
Supplement: NIHMS655158-supplement-Supplementary_Online_Content.pdf [file NIHMS655158-supplement-Supplementary_Online_Content.pdf]

## Supplementary Online Content

Wang L-S, Naj AC, Graham RR, et al; Alzheimer's Disease Genetics Consortium; National Institute on Aging–Late-Onset Alzheimer's Disease (NIA-LOAD) Family Study. Rarity of the Alzheimer disease–protective *APP* A673T variant in the United States. *JAMA Neurol*. Published online December 22, 2014. doi:10.1001/jamaneurol.2014.2157.

**eFigure 1.** Cluster plot for rs63750847 from exome array called using Illumina Genome Studio.

**eFigure 2.** EIGENSTRAT principle components plot using HapMap 3 genome-wide SNP array and 3956 cases/3634 controls genotyped using exome chip at Children's Hospital of Philadelphia and University of Miami, prior to quality control.

This supplementary material has been provided by the authors to give readers additional information about their work.

**eFigure 1.** Cluster plot for rs63750847 from exome array called using Illumina Genome Studio.

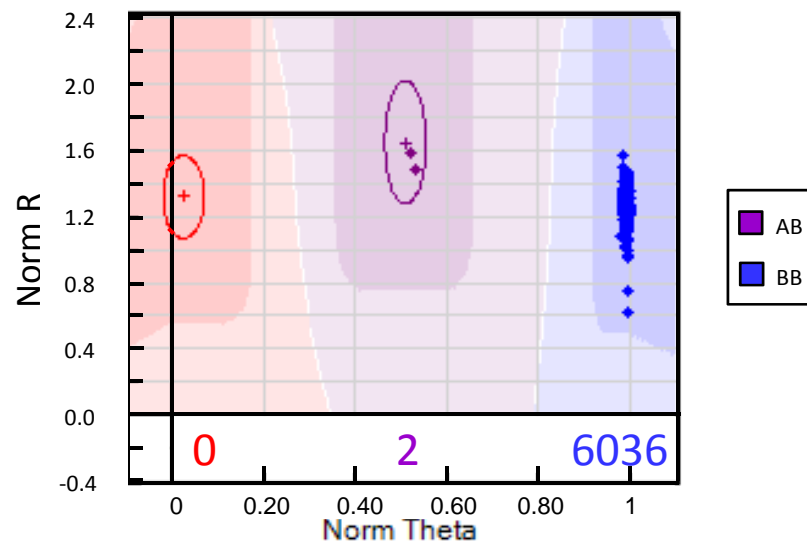

Norm theta is arc-tangent of the A-to-B allele normalized intensities in degrees (allele intensities are normalized by Illumina's algorithm). Norm R is total normalized intensities of the two alleles. Numbers below clusters are the number of subjects with a given genotype. Cluster plots are: A, from Center of Applied Genomics, Children's Hospital of Philadelphia; B and C, from NorthShore.

**eFigure 2.** EIGENSTRAT principle components plot using HapMap 3 genome-wide SNP array and 3956 cases/3634 controls genotyped using exome chip at Children’s Hospital of Philadelphia and University of Miami, prior to quality control.

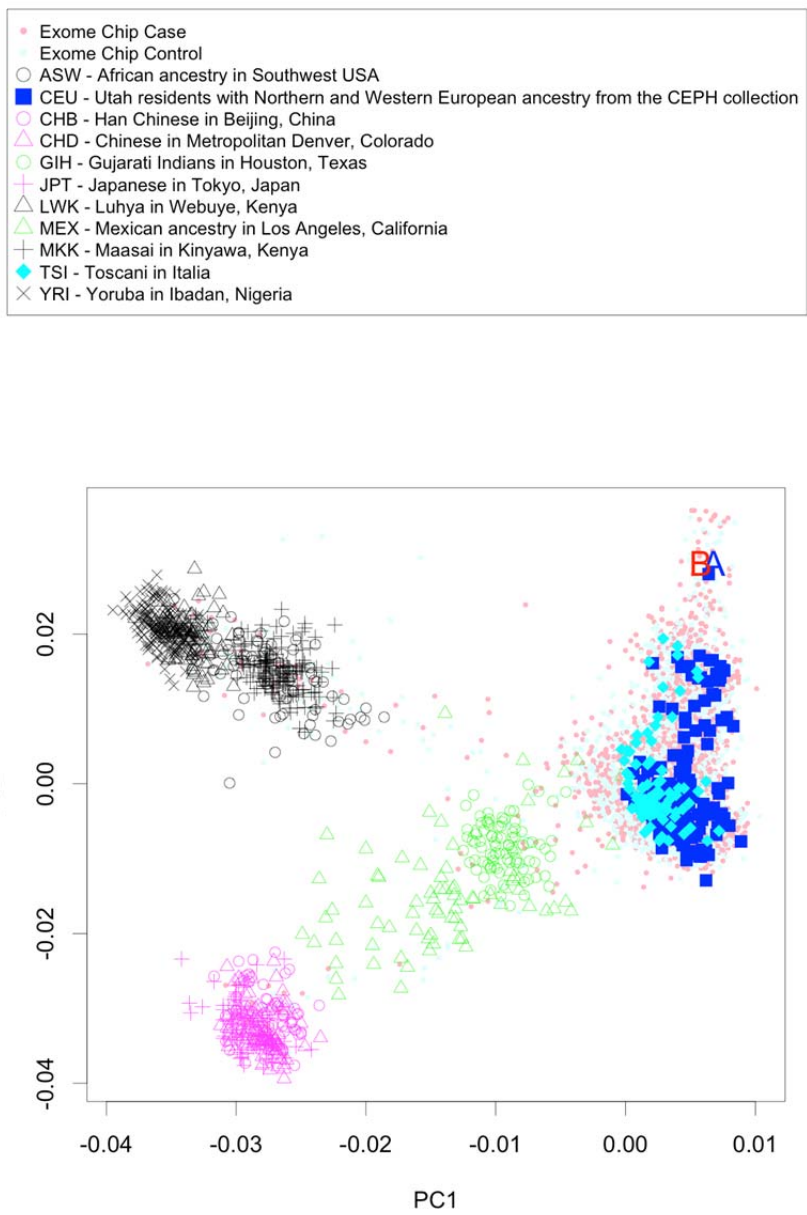

We have marked the two A673T carriers as A (unaffected control) and B (case).
